# Supplementary material for: Bioaccessibility of Polycyclic Aromatic Hydrocarbons (PAHs) in Grilled Meat: The Effects of Meat Doneness and Fat Content
Source: MDPI journal article supplement (doi:10.3390/ijerph19020736), 2022-01-10
Supplement: s1 [file s1]

Supplementary Materials

Table S1.Cooking parameters for meat at three different degrees of doneness.

| Samples | Degree of doneness | Cooking time<br>(min) | Surface (browning/charring) |
|---------|--------------------|-----------------------|-----------------------------|
| Chicken | Rare               | 4                     | Slight                      |
|         | Medium             | 5                     | Moderate                    |
|         | Well done          | 6                     | Well browned/Blackened      |
| Beef    | Rare               | 6                     | Slight                      |
|         | Medium             | 7                     | Moderate                    |
|         | Well done          | 8                     | Well browned/Blackened      |

**Table S2.** Composition of digestive juices used per 100 ml of ultrapure water.

| Components | Digestive juices                                                                                                                                                  |                                                                                                                     |                                                                                                                    |                                                                         |
|------------|-------------------------------------------------------------------------------------------------------------------------------------------------------------------|---------------------------------------------------------------------------------------------------------------------|--------------------------------------------------------------------------------------------------------------------|-------------------------------------------------------------------------|
|            | Saliva<br>(pH $6.8 \pm 0.2$ )                                                                                                                                     | Gastric<br>(pH $1.30 \pm 0.02$ )                                                                                    | Duodenal<br>(pH $8.1 \pm 0.2$ )                                                                                    | Bile<br>(pH $8.2 \pm 0.2$ )                                             |
| Inorganic  | - 90 mg KCl<br>- 20 mg KSCN<br>- 89 mg NaH <sub>2</sub> PO <sub>4</sub><br>- 58 mg Na <sub>2</sub> SO <sub>4</sub><br>- 30 mg NaCl<br>- 170 mg NaHCO <sub>3</sub> | - 275 mg NaCl<br>- 27 mg NaH <sub>2</sub> PO <sub>4</sub><br>- 82 mg KCl<br>- 31 mg NH <sub>4</sub> Cl<br>- HCl 1 M | - 700 mg NaCl<br>- 339 mg NaHCO <sub>3</sub><br>- 8 mg KH <sub>2</sub> PO <sub>4</sub><br>- 56 mg KCl<br>- HCl 1 M | - 526 mg NaCl<br>- 579 mg NaHCO <sub>3</sub><br>- 38 mg KCl<br>- HCl 1M |
| Organic    | - 20 mg urea                                                                                                                                                      | - 65 mg glucose<br>- 2 mg glucuronic acid<br>- 8.5 mg urea<br>- 33 mg glucosamine<br>hydrochloride<br>-100 mg BSA   | - 100 mg urea<br>- 100 mg BSA                                                                                      | - 25 mg urea<br>- 180 mg BSA                                            |
| Bioactive  | - 29 mg $\alpha$ -amylase<br>- 1.5 mg uric acid<br>- 2.5 mg mucin                                                                                                 | - 250 mg pepsin                                                                                                     | - 900 mg pancreatin<br>- 150 mg lipase                                                                             | - 3g bile salt                                                          |

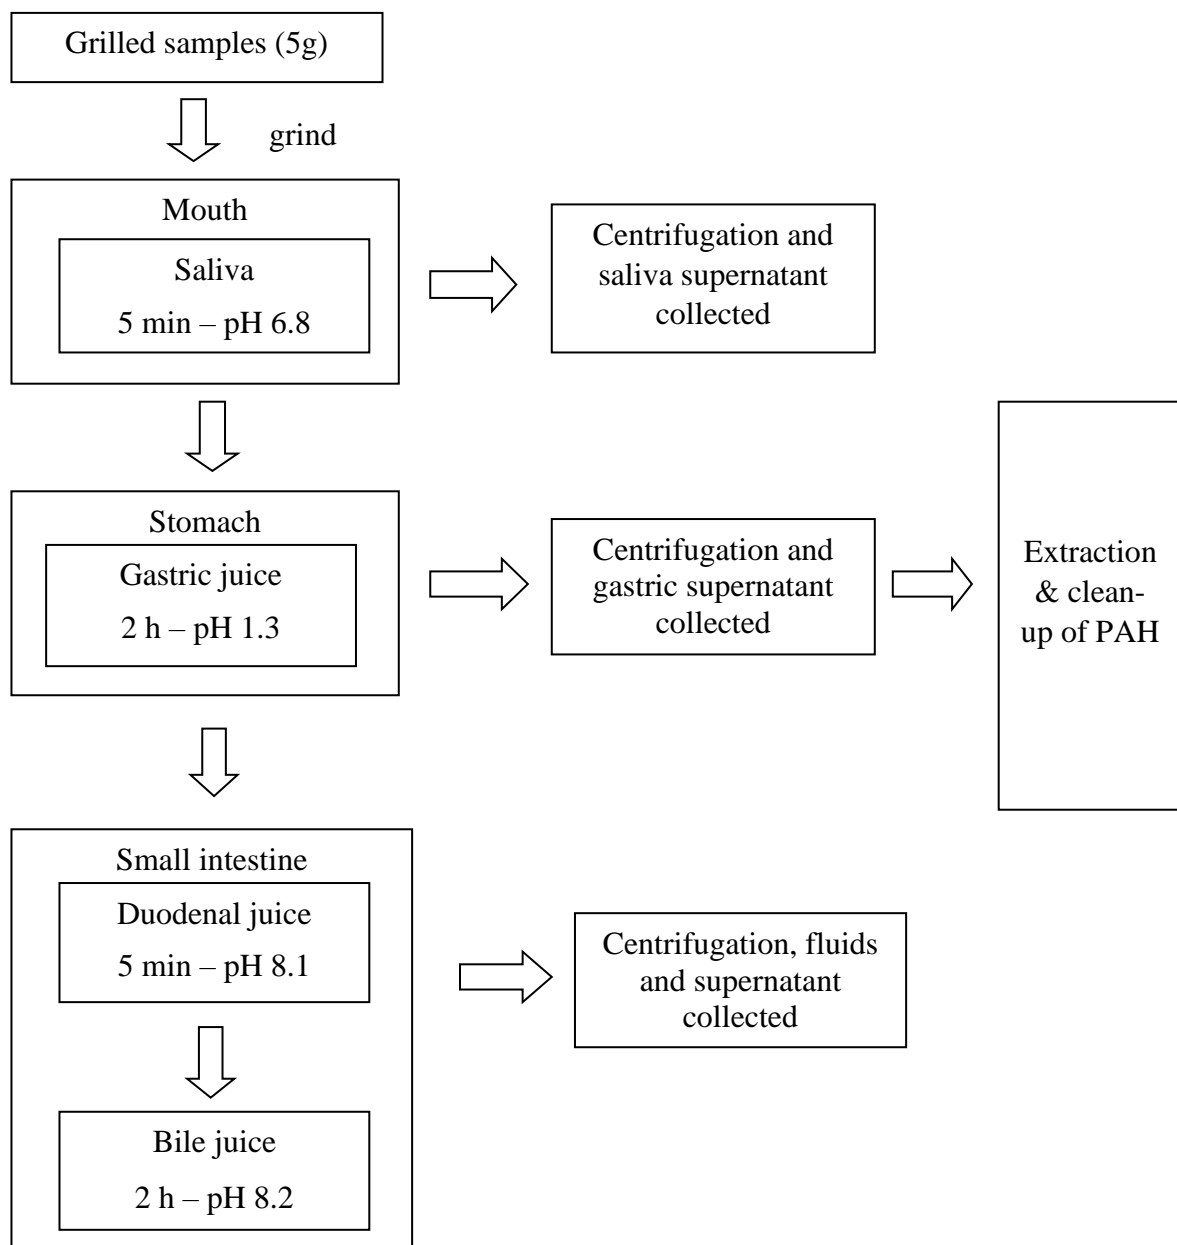

**Figure S1.** Schematic diagram of the *in vitro* digestive procedure (Adapted from [17]).
